# Supplementary material
Source: ML conference proceedings conference paper supplement (https://proceedings.mlr.press/v89/okuno19b.html)
Supplement: Supplementary file [file okuno19b-supp.pdf]

## Supplementary Material:

### Robust Graph Embedding with Noisy Link Weights

#### A Lemmas and Proofs

##### A.1 Law of Large Numbers for Doubly-Indexed Partially-Dependent Random Variables

In this section, we first show and prove Theorem A.1, that is the law of large numbers, for doubly-indexed partially-dependent random variables. Then, we apply Theorem A.1 to the empirical probability  $\beta$ -score and the empirical moment  $\beta$ -score for proving Lemma A.2 and A.3 in which we show convergence

$$(6) \xrightarrow{p} E_{\mathcal{X}^2}(u_{\beta}^{(w_{12}|\mathbf{x}_1, \mathbf{x}_2)}(q, p_{\theta})), \quad L_{\beta, n}(\boldsymbol{\theta}) \xrightarrow{p} u_{\beta}^{(\mathbf{x}_1, \mathbf{x}_2)}(g, \mu_{\theta}; \nu),$$

as  $n \rightarrow \infty$ , respectively.

**Theorem A.1.** Let  $\mathbf{Z} := (Z_{ij})$  be an array of random variables  $Z_{ij} \in \mathcal{Z}$ ,  $(i, j) \in \mathcal{I}_n := \{(i, j) \mid 1 \leq i < j \leq n\}$ , and  $h : \mathcal{Z} \rightarrow \mathbb{R}$  be a bounded and continuous function. We assume that  $Z_{ij}$  is independent of  $Z_{kl}$  if  $(k, l) \in \mathcal{R}_n(i, j) := \{(k, l) \in \mathcal{I}_n \mid k, l \in \{1, \dots, n\} \setminus \{i, j\}\}$ , and  $E_{\mathbf{Z}}(h(Z_{ij})^2) < \infty$ , for all  $(i, j) \in \mathcal{I}_n$ . Then the average of  $h(Z_{ij})$  over  $\mathcal{I}_n$  converges to the expectation in probability as  $n \rightarrow \infty$ ; that is

$$\frac{1}{|\mathcal{I}_n|} \sum_{(i,j) \in \mathcal{I}_n} h(Z_{ij}) = \frac{1}{|\mathcal{I}_n|} \sum_{(i,j) \in \mathcal{I}_n} E_{\mathbf{Z}}(h(Z_{ij})) + O_p(1/\sqrt{n}).$$

**Proof of Theorem A.1.** Regarding the variance of the average, we have

$$\begin{aligned} V_{\mathbf{Z}} \left( \frac{1}{|\mathcal{I}_n|} \sum_{(i,j) \in \mathcal{I}_n} h(Z_{ij}) \right) &= E_{\mathbf{Z}} \left( \left( \frac{1}{|\mathcal{I}_n|} \sum_{(i,j) \in \mathcal{I}_n} h(Z_{ij}) \right)^2 \right) - E_{\mathbf{Z}} \left( \frac{1}{|\mathcal{I}_n|} \sum_{(i,j) \in \mathcal{I}_n} h(Z_{ij}) \right)^2 \\ &= \frac{1}{|\mathcal{I}_n|^2} \left( \sum_{(i,j) \in \mathcal{I}_n} \sum_{(k,l) \in \mathcal{I}_n} E_{\mathbf{Z}}(h(Z_{ij})h(Z_{kl})) - \left( \sum_{(i,j) \in \mathcal{I}_n} E_{\mathbf{Z}}(h(Z_{ij})) \right)^2 \right) \\ &= \frac{1}{|\mathcal{I}_n|^2} \sum_{(i,j) \in \mathcal{I}_n} \sum_{(k,l) \in \mathcal{I}_n \setminus \mathcal{R}_n(i,j)} (E_{\mathbf{Z}}(h(Z_{ij})h(Z_{kl})) - E_{\mathbf{Z}}(h(Z_{ij}))E_{\mathbf{Z}}(h(Z_{kl}))), \end{aligned}$$

where  $E_{\mathbf{Z}}, V_{\mathbf{Z}}$  represent expectation and variance with respect to  $\mathbf{Z}$ . By considering  $E_{\mathbf{Z}}(|h(Z_{ij})|) \leq E_{\mathbf{Z}}(h(Z_{ij})^2)^{1/2} < \infty$ ,  $E_{\mathbf{Z}}(|h(Z_{ij})h(Z_{kl})|) \leq \sqrt{E_{\mathbf{Z}}(h(Z_{ij})^2)E_{\mathbf{Z}}(h(Z_{kl})^2)} < \infty$ ,  $|\mathcal{I}_n| = O(n^2)$  and  $|\mathcal{I}_n \setminus \mathcal{R}_n(i, j)| = O(n)$ , the last formula is of order  $O(n^{-4} \cdot n^2 \cdot n) = O(n^{-1})$ . Therefore,

$$V_{\mathbf{Z}} \left( \frac{1}{|\mathcal{I}_n|} \sum_{(i,j) \in \mathcal{I}_n} h(Z_{ij}) \right) = O(n^{-1}). \quad (21)$$

(21) and Chebyshev's inequality indicate the assertion.  $\square$

The same assertion appears in Supplement B.1 of Okuno et al. (2018). We note that the convergence rate is only  $O_p(1/\sqrt{n})$  but not  $O_p(1/\sqrt{|\mathcal{I}_n|}) = O_p(1/n)$ , even though we leverage  $O(|\mathcal{I}_n|) = O(n^2)$  observations  $\{Z_{ij}\}_{(i,j) \in \mathcal{I}_n}$ .

**Lemma A.2.** Let  $\Theta$  be a parameter set. Assuming that  $w_{ij} \mid \mathbf{x}_i, \mathbf{x}_j \stackrel{\text{indep.}}{\sim} q$ ,  $\mathbf{x}_i \stackrel{\text{i.i.d.}}{\sim} Q$ ,  $\text{supp}Q \subset \mathcal{X}$  where  $\mathcal{X} \subset \mathbb{R}^p$  is a compact set,  $\sum_{w \in \mathbb{N}_0} q(w \mid \mathbf{x}_1, \mathbf{x}_2) p_{\theta}(w \mid \mathbf{x}_1, \mathbf{x}_2)^{\delta} < \infty$ ,  $\sum_{w \in \mathbb{N}_0} p_{\theta}(w \mid \mathbf{x}_1, \mathbf{x}_2)^{1+\delta} < \infty$  for all  $\delta > 0$ ,  $\mathbf{x}_1, \mathbf{x}_2 \in \mathcal{X}$ . Then, it holds for all  $\boldsymbol{\theta} \in \Theta$  that

$$(6) = E_{\mathcal{X}^2}(d_{\beta}^{(w_{12}|\mathbf{x}_1, \mathbf{x}_2)}(q, p_{\theta})) + O_p(1/\sqrt{n}),$$

indicating  $(6) \xrightarrow{p} E_{\mathcal{X}^2}(d_{\beta}^{(w_{12}|\mathbf{x}_1, \mathbf{x}_2)}(q, p_{\theta}))$  ( $n \rightarrow \infty$ ).

**Proof of Lemma A.2.** Applying Theorem A.1 to

$$Z_{ij} := (w_{ij}, \mathbf{x}_i, \mathbf{x}_j), h(Z_{ij}) := -\frac{p_{\theta}(w_{ij} | \mathbf{x}_i, \mathbf{x}_j)^{\beta} - 1}{\beta} + \sum_{w \in \mathbb{N}_0} \frac{p_{\theta}(w | \mathbf{x}_i, \mathbf{x}_j)^{1+\beta}}{1 + \beta},$$

immediately proves the assertion, as  $E_Z(h(Z_{ij})^2) < \infty$  follows from the assumptions; the convergence limit is,

$$\begin{aligned} & \frac{1}{|\mathcal{I}_n|} \sum_{(i,j) \in \mathcal{I}_n} E_Z(h(Z_{ij})) \\ &= \frac{1}{|\mathcal{I}_n|} \sum_{(i,j) \in \mathcal{I}_n} E_{\mathcal{X}^2} \left( E \left( -\frac{p_{\theta}(w_{ij} | \mathbf{x}_i, \mathbf{x}_j)^{\beta} - 1}{\beta} + \sum_{w \in \mathbb{N}_0} \frac{p_{\theta}(w | \mathbf{x}_i, \mathbf{x}_j)^{1+\beta}}{1 + \beta} \middle| \mathbf{x}_i, \mathbf{x}_j \right) \right) \\ &= \frac{1}{|\mathcal{I}_n|} \sum_{(i,j) \in \mathcal{I}_n} E_{\mathcal{X}^2} \left( \sum_{w' \in \mathbb{N}_0} q(w' | \mathbf{x}_i, \mathbf{x}_j) \left\{ -\frac{p_{\theta}(w' | \mathbf{x}_i, \mathbf{x}_j)^{\beta} - 1}{\beta} + \sum_{w \in \mathbb{N}_0} \frac{p_{\theta}(w | \mathbf{x}_i, \mathbf{x}_j)^{1+\beta}}{1 + \beta} \right\} \right) \\ &= \frac{1}{|\mathcal{I}_n|} \sum_{(i,j) \in \mathcal{I}_n} E_{\mathcal{X}^2} \left( -\sum_{w \in \mathbb{N}_0} q(w | \mathbf{x}_i, \mathbf{x}_j) \frac{p_{\theta}(w | \mathbf{x}_i, \mathbf{x}_j)^{\beta} - 1}{\beta} + \sum_{w \in \mathbb{N}_0} \frac{p_{\theta}(w | \mathbf{x}_i, \mathbf{x}_j)^{1+\beta}}{1 + \beta} \right) \\ &= \frac{1}{|\mathcal{I}_n|} \sum_{(i,j) \in \mathcal{I}_n} E_{\mathcal{X}^2}(d_{\beta}^{(w_{ij} | \mathbf{x}_i, \mathbf{x}_j)}(q, p_{\theta})) \\ &= \frac{1}{|\mathcal{I}_n|} \sum_{(i,j) \in \mathcal{I}_n} E_{\mathcal{X}^2}(d_{\beta}^{(w_{12} | \mathbf{x}_1, \mathbf{x}_2)}(q, p_{\theta})) \\ &= E_{\mathcal{X}^2}(d_{\beta}^{(w_{12} | \mathbf{x}_1, \mathbf{x}_2)}(q, p_{\theta})). \end{aligned}$$

Thus proving the assertion. □

**Lemma A.3.** Let  $\Theta$  be a parameter set. Assuming (9)–(11), it holds for all  $\theta \in \Theta$  that

$$L_{\beta, n}(\theta) = u_{\beta}^{(\mathbf{x}_1, \mathbf{x}_2)}(g, \mu_{\theta}; \nu) + O_p(1/\sqrt{n}),$$

indicating  $L_{\beta, n}(\theta) \xrightarrow{P} u_{\beta}^{(\mathbf{x}_1, \mathbf{x}_2)}(g, \mu_{\theta}; \nu)$  ( $n \rightarrow \infty$ ).

**Proof of Lemma A.3.** Applying Theorem A.1 to

$$Z_{ij} := (w_{ij}, \mathbf{x}_i, \mathbf{x}_j), h(Z_{ij}) := -w_{ij} \frac{\mu_{\theta}(\mathbf{x}_i, \mathbf{x}_j)^{\beta} - 1}{\beta} + \frac{\mu_{\theta}(\mathbf{x}_i, \mathbf{x}_j)^{1+\beta}}{1 + \beta},$$

immediately proves the assertion, as  $E_Z(h(Z_{ij})^2) < \infty$  follows from the assumptions; the convergence limit is,

$$\begin{aligned} & \frac{1}{|\mathcal{I}_n|} \sum_{(i,j) \in \mathcal{I}_n} E_Z(h(Z_{ij})) = \frac{1}{|\mathcal{I}_n|} \sum_{(i,j) \in \mathcal{I}_n} E_{\mathcal{X}^2} \left( E \left( -w_{ij} \frac{\mu_{\theta}(\mathbf{x}_i, \mathbf{x}_j)^{\beta} - 1}{\beta} + \frac{\mu_{\theta}(\mathbf{x}_i, \mathbf{x}_j)^{1+\beta}}{1 + \beta} \middle| \mathbf{x}_i, \mathbf{x}_j \right) \right) \\ &= \frac{1}{|\mathcal{I}_n|} \sum_{(i,j) \in \mathcal{I}_n} E_{\mathcal{X}^2} \left( -g(\mathbf{x}_i, \mathbf{x}_j) \frac{\mu_{\theta}(\mathbf{x}_i, \mathbf{x}_j)^{\beta} - 1}{\beta} + \frac{\mu_{\theta}(\mathbf{x}_i, \mathbf{x}_j)^{1+\beta}}{1 + \beta} \right) \\ &= \frac{1}{|\mathcal{I}_n|} \sum_{(i,j) \in \mathcal{I}_n} u_{\beta}^{(\mathbf{x}_i, \mathbf{x}_j)}(g, \mu_{\theta}; \nu) \\ &= \frac{1}{|\mathcal{I}_n|} \sum_{(i,j) \in \mathcal{I}_n} u_{\beta}^{(\mathbf{x}_1, \mathbf{x}_2)}(g, \mu_{\theta}; \nu) \\ &= u_{\beta}^{(\mathbf{x}_1, \mathbf{x}_2)}(g, \mu_{\theta}; \nu). \end{aligned}$$

Thus proving the assertion. □

## A.2 Evaluation of $M(\boldsymbol{\theta})$ in Theorem 3.1

**Lemma A.4.** Suppose that  $\varepsilon \geq \varepsilon_*$ ,  $\boldsymbol{\theta} \in \Theta_\varepsilon := \{\boldsymbol{\theta} \in \Theta \mid E_{\mathcal{X}^2}(\eta_*(\mathbf{x}_1, \mathbf{x}_2)\mu_\theta(\mathbf{x}_1, \mathbf{x}_2)^{\beta_0}) < \varepsilon\}$ , and  $\beta \in (0, \beta_0]$ , it holds for

$$M(\boldsymbol{\theta}) := \beta^{-1} E_{\mathcal{X}^2} (\eta_*(\mathbf{x}_1, \mathbf{x}_2)\mu_\theta(\mathbf{x}_1, \mathbf{x}_2)^\beta) \varepsilon^{-\beta/\beta_0}, \quad \alpha := E_{\mathcal{X}^2}(\eta_*(\mathbf{x}_1, \mathbf{x}_2)),$$

that

$$M(\boldsymbol{\theta}) \leq \alpha^{1-\beta/\beta_0} \beta^{-1} \quad (\forall \boldsymbol{\theta} \in \Theta_\varepsilon).$$

**Proof of Lemma A.4.** Proof is based on Lyapunov's inequality, that is,  $E(Z^\beta) \leq E(Z^{\beta_0})^{\beta/\beta_0}$  for any non-negative real-valued random variable  $Z$  and  $0 < \beta \leq \beta_0 < \infty$ . For applying this inequality, we first fix  $\boldsymbol{\theta} \in \Theta_\varepsilon$ , and expand  $M(\boldsymbol{\theta})$  with the probability density function (pdf)  $\nu$  of the random variable  $(\mathbf{x}_1, \mathbf{x}_2)$  as

$$\begin{aligned} M(\boldsymbol{\theta}) &= \beta^{-1} E_{\mathcal{X}^2} (\eta_*(\mathbf{x}_1, \mathbf{x}_2)\mu_\theta(\mathbf{x}_1, \mathbf{x}_2)^\beta) \varepsilon^{-\beta/\beta_0} \\ &= \beta^{-1} \varepsilon^{-\beta/\beta_0} \iint_{\mathcal{X}^2} \nu(\mathbf{x}_1, \mathbf{x}_2) \eta_*(\mathbf{x}_1, \mathbf{x}_2) \mu_\theta(\mathbf{x}_1, \mathbf{x}_2)^\beta d\mathbf{x}_1 d\mathbf{x}_2 \\ &= \alpha \beta^{-1} \varepsilon^{-\beta/\beta_0} \left( \iint_{\mathcal{X}^2} \underbrace{\frac{\nu(\mathbf{x}_1, \mathbf{x}_2) \eta_*(\mathbf{x}_1, \mathbf{x}_2)}{\alpha}}_{=: \tilde{\nu}(\mathbf{x}_1, \mathbf{x}_2)} \mu_\theta(\mathbf{x}_1, \mathbf{x}_2)^\beta d\mathbf{x}_1 d\mathbf{x}_2 \right). \end{aligned} \quad (22)$$

In eq. (22),  $\tilde{\nu}(\mathbf{x}_1, \mathbf{x}_2) := \nu(\mathbf{x}_1, \mathbf{x}_2)\eta_*(\mathbf{x}_1, \mathbf{x}_2)/\alpha$  can be regarded as a pdf, since  $\tilde{\nu}(\mathbf{x}_1, \mathbf{x}_2) \geq 0$  for all  $(\mathbf{x}_1, \mathbf{x}_2)$  and

$$\begin{aligned} \iint_{\mathcal{X}^2} \tilde{\nu}(\mathbf{x}_1, \mathbf{x}_2) d\mathbf{x}_1 d\mathbf{x}_2 &= \iint_{\mathcal{X}^2} \frac{\nu(\mathbf{x}_1, \mathbf{x}_2) \eta_*(\mathbf{x}_1, \mathbf{x}_2)}{\alpha} d\mathbf{x}_1 d\mathbf{x}_2 \\ &= \alpha^{-1} \iint_{\mathcal{X}^2} \nu(\mathbf{x}_1, \mathbf{x}_2) \eta_*(\mathbf{x}_1, \mathbf{x}_2) d\mathbf{x}_1 d\mathbf{x}_2 \\ &= \alpha^{-1} E_{\mathcal{X}^2}(\eta_*(\mathbf{x}_1, \mathbf{x}_2)) = \alpha^{-1} \alpha = 1. \end{aligned}$$

As  $\tilde{\nu}$  can be regarded as a pdf and  $\mu_\theta$  is non-negative, Lyapunov's inequality indicates that

$$\begin{aligned} M(\boldsymbol{\theta}) &= (22) \stackrel{(\text{Lyapunov})}{\leq} \alpha \beta^{-1} \varepsilon^{-\beta/\beta_0} \left( \iint_{\mathcal{X}^2} \tilde{\nu}(\mathbf{x}_1, \mathbf{x}_2) \mu_\theta(\mathbf{x}_1, \mathbf{x}_2)^{\beta_0} d\mathbf{x}_1 d\mathbf{x}_2 \right)^{\beta/\beta_0} \\ &= \alpha \beta^{-1} \varepsilon^{-\beta/\beta_0} \left( \iint_{\mathcal{X}^2} \frac{\nu(\mathbf{x}_1, \mathbf{x}_2) \eta_*(\mathbf{x}_1, \mathbf{x}_2)}{\alpha} \mu_\theta(\mathbf{x}_1, \mathbf{x}_2)^{\beta_0} d\mathbf{x}_1 d\mathbf{x}_2 \right)^{\beta/\beta_0} \\ &= \alpha^{1-\beta/\beta_0} \beta^{-1} \varepsilon^{-\beta/\beta_0} \left( \iint_{\mathcal{X}^2} \nu(\mathbf{x}_1, \mathbf{x}_2) \eta_*(\mathbf{x}_1, \mathbf{x}_2) \mu_\theta(\mathbf{x}_1, \mathbf{x}_2)^{\beta_0} d\mathbf{x}_1 d\mathbf{x}_2 \right)^{\beta/\beta_0} \\ &= \alpha^{1-\beta/\beta_0} \beta^{-1} \varepsilon^{-\beta/\beta_0} E_{\mathcal{X}^2} (\eta_*(\mathbf{x}_1, \mathbf{x}_2) \mu_\theta(\mathbf{x}_1, \mathbf{x}_2)^{\beta_0})^{\beta/\beta_0} \\ &\leq \alpha^{1-\beta/\beta_0} \beta^{-1} \varepsilon^{-\beta/\beta_0} \varepsilon^{\beta/\beta_0} \quad (\because \boldsymbol{\theta} \in \Theta_\varepsilon) \\ &= \alpha^{1-\beta/\beta_0} \beta^{-1}. \end{aligned}$$

The assertion is proved.  $\square$

## A.3 Proof of Theorem 3.2

We first verify that (19) is equivalent to  $\partial h(\boldsymbol{\theta})/\partial \boldsymbol{\theta} = \mathbf{0}$ . From the definition of  $h^{(t)}(\boldsymbol{\theta})$  and the assumption (i)  $\mu_\theta(\mathbf{x}_1, \mathbf{x}_2) \in C^1(\Theta)$  for all  $(\mathbf{x}_1, \mathbf{x}_2) \in \mathcal{X}^2$ , we have

$$\begin{aligned} \frac{\partial h(\boldsymbol{\theta})}{\partial \boldsymbol{\theta}} &= \frac{\partial E^{(1)}(h^{(1)}(\boldsymbol{\theta}))}{\partial \boldsymbol{\theta}} = E^{(1)} \left( \frac{\partial h^{(1)}(\boldsymbol{\theta})}{\partial \boldsymbol{\theta}} \right) \\ &= E^{(1)} \left( \frac{\partial}{\partial \boldsymbol{\theta}} \left\{ - \sum_{(i,j) \in \mathcal{W}_n^{(1)}} w_{ij} \frac{\mu_\theta(\mathbf{x}_i, \mathbf{x}_j)^\beta - 1}{\beta} + \lambda \sum_{(i,j) \in \mathcal{I}_n^{(1)}} \frac{\mu_\theta(\mathbf{x}_i, \mathbf{x}_j)^{1+\beta}}{1+\beta} \right\} \right) \end{aligned}$$

$$\begin{aligned}
 &= E^{(1)} \left( \left\{ - \sum_{(i,j) \in \mathcal{W}_n^{(1)}} w_{ij} \mu_{\theta}(\mathbf{x}_i, \mathbf{x}_j)^{\beta} \frac{\partial \log \mu_{\theta}(\mathbf{x}_i, \mathbf{x}_j)}{\partial \theta} + \lambda \sum_{(i,j) \in \mathcal{I}_n^{(1)}} \mu_{\theta}(\mathbf{x}_i, \mathbf{x}_j)^{1+\beta} \frac{\partial \log \mu_{\theta}(\mathbf{x}_i, \mathbf{x}_j)}{\partial \theta} \right\} \right) \\
 &= -E^{(1)} \left( \sum_{(i,j) \in \mathcal{W}_n^{(1)}} w_{ij} \mu_{\theta}(\mathbf{x}_i, \mathbf{x}_j)^{\beta} \frac{\partial \log \mu_{\theta}(\mathbf{x}_i, \mathbf{x}_j)}{\partial \theta} \right) + \lambda E^{(1)} \left( \sum_{(i,j) \in \mathcal{I}_n^{(1)}} \mu_{\theta}(\mathbf{x}_i, \mathbf{x}_j)^{1+\beta} \frac{\partial \log \mu_{\theta}(\mathbf{x}_i, \mathbf{x}_j)}{\partial \theta} \right) \\
 &= -\frac{m_1}{|\mathcal{W}_n|} \sum_{(i,j) \in \mathcal{W}_n} w_{ij} \mu_{\theta}(\mathbf{x}_i, \mathbf{x}_j)^{\beta} \frac{\partial \log \mu_{\theta}(\mathbf{x}_i, \mathbf{x}_j)}{\partial \theta} + \lambda \frac{m_2}{|\mathcal{I}_n|} \sum_{(i,j) \in \mathcal{I}_n} \mu_{\theta}(\mathbf{x}_i, \mathbf{x}_j)^{1+\beta} \frac{\partial \log \mu_{\theta}(\mathbf{x}_i, \mathbf{x}_j)}{\partial \theta} \\
 &= \frac{1}{|\mathcal{I}_n|} \sum_{(i,j) \in \mathcal{I}_n} \left\{ \left( -vm_1 w_{ij} + \lambda m_2 \mu_{\theta}(\mathbf{x}_i, \mathbf{x}_j) \right) \mu_{\theta}(\mathbf{x}_i, \mathbf{x}_j)^{\beta} \frac{\partial \log \mu_{\theta}(\mathbf{x}_i, \mathbf{x}_j)}{\partial \theta} \right\}.
 \end{aligned}$$

We next verify the convergence  $E^*(\|\theta^{(t)} - \theta_*\|_2^2) \rightarrow 0$ . From the assumption (ii),  $\theta_*$  is the unique minimizer of  $h(\theta)$  over  $\Theta$ . Regarding the estimator  $\theta^{(t)}$  defined as (18) with the assumption (iii), [Moulines and Bach \(2011\)](#) Theorem 2 asserts that  $E^*(\|\theta^{(t)} - \theta_*\|_2^2) \rightarrow 0$  if the following conditions (C-1)–(C-3) hold: (C-1)  $E^{(t)} \left( \frac{\partial h^{(t)}(\theta)}{\partial \theta} \right) = \frac{\partial h(\theta)}{\partial \theta}$  for all  $\theta \in \Theta$ , (C-2)  $h(\theta)$  is strongly convex on  $\Theta$ , i.e.,  $\exists \lambda > 0$  such that  $h(\theta_1) - h(\theta_2) \geq \langle \frac{\partial h(\theta_2)}{\partial \theta}, \theta_1 - \theta_2 \rangle + \lambda \|\theta_1 - \theta_2\|_2^2$  for all  $\theta_1, \theta_2 \in \Theta$ , and (C-3)  $\|\frac{\partial h^{(t)}(\theta)}{\partial \theta}\|_2$  is bounded on  $\Theta$  for any  $(\mathcal{W}_n^{(t)}, \mathcal{I}_n^{(t)})$ . These conditions (C-1)–(C-3) correspond to the conditions (H1), (H3), and (H5), that are required in [Moulines and Bach \(2011\)](#) Theorem 2, respectively.

In case of Theorem 3.2, (C-1) holds as we have already seen for showing (19); note that  $h^{(t)}(\theta) \in C^1(\Theta)$  from the assumption (i). (C-2) is assumed as (ii), and (C-3) holds because  $h^{(t)}(\theta)$  is  $C^1$  on the compact set  $\Theta$  and  $(\mathcal{W}_n^{(t)}, \mathcal{I}_n^{(t)})$  is a random variable taking value in a finite set. Thus we have proved the convergence.  $\square$

## References

- Moulines, E. and Bach, F. R. (2011). Non-asymptotic analysis of stochastic approximation algorithms for machine learning. In *Advances in Neural Information Processing Systems (NIPS)*, pages 451–459.
- Okuno, A., Hada, T., and Shimodaira, H. (2018). A probabilistic framework for multi-view feature learning with many-to-many associations via neural networks. In *Proceedings of the International Conference on Machine Learning (ICML)*.
